# Supplementary material for: The Expression of Transcription Factors is Different in Papillary Thyroid Cancer Cells during TNF - α induced EMT
Source: PubMed Central journal article supplement (PMC8040707; doi:10.7150/jca.53349), 2021-03-10

**Fig.s1 Morphological change of induced cells**

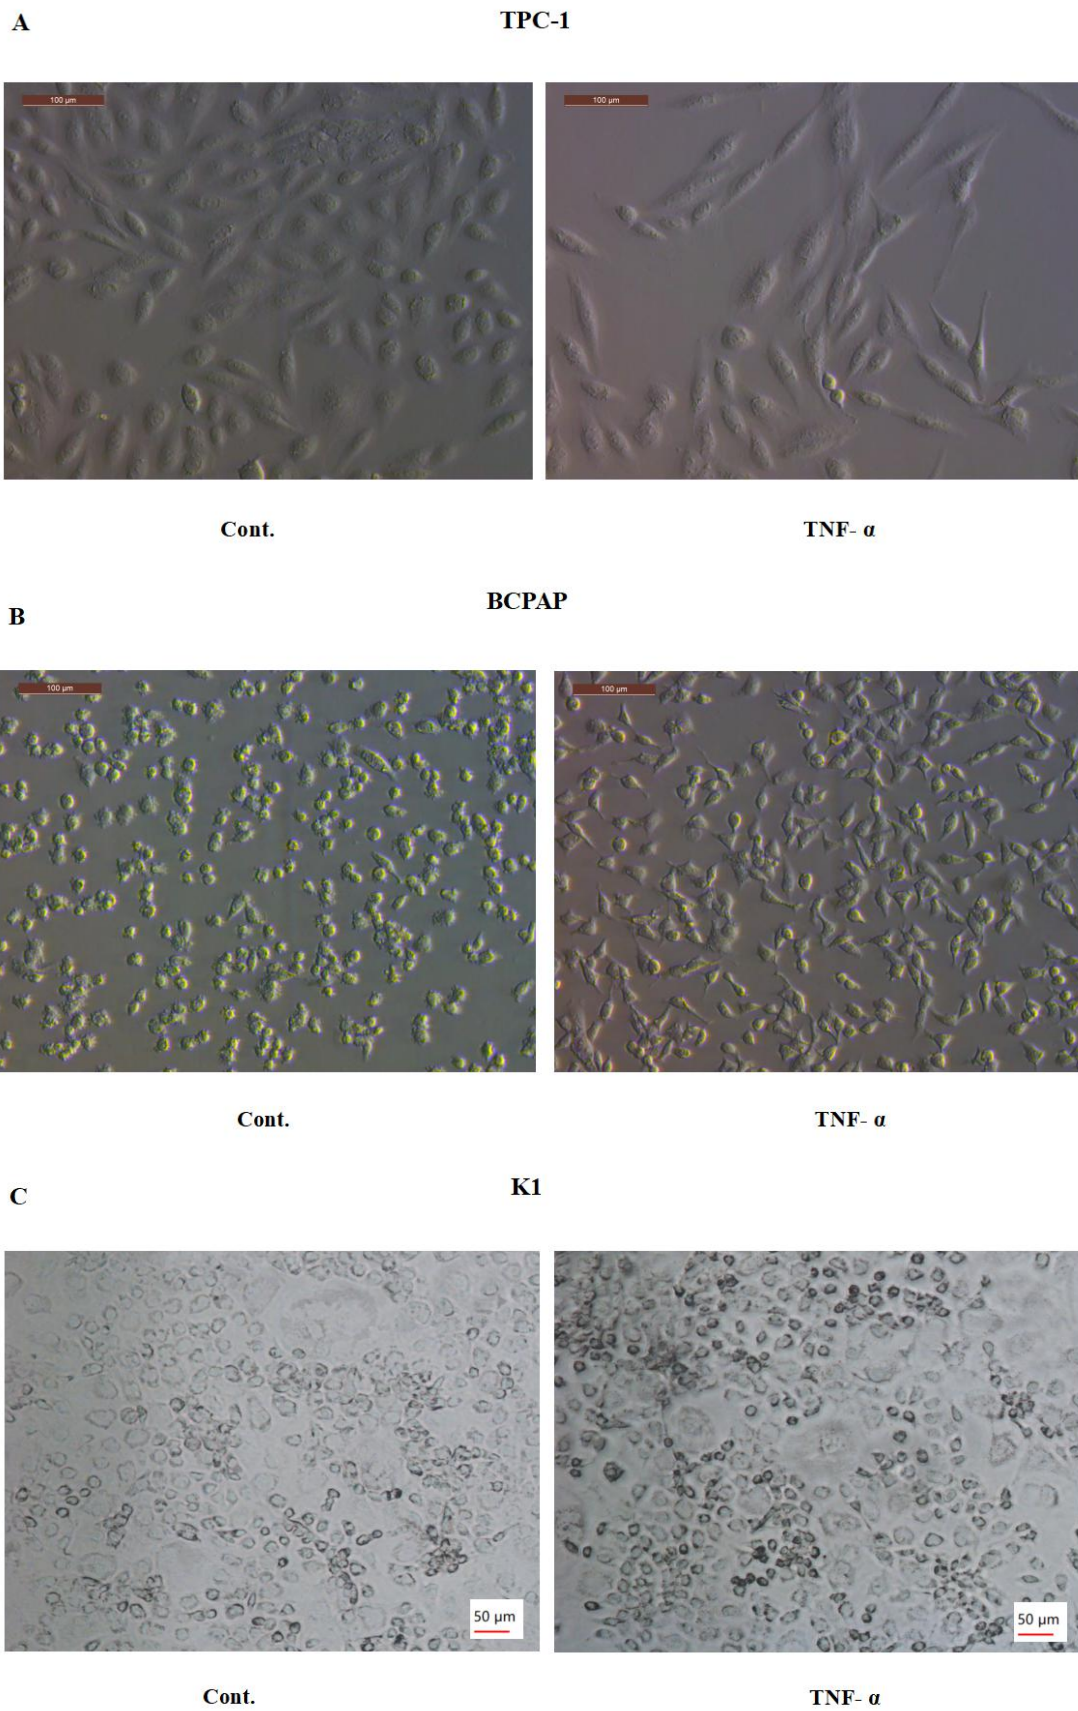

**Fig.s2** Immunofluorescence images of EMT markers in TPC-1

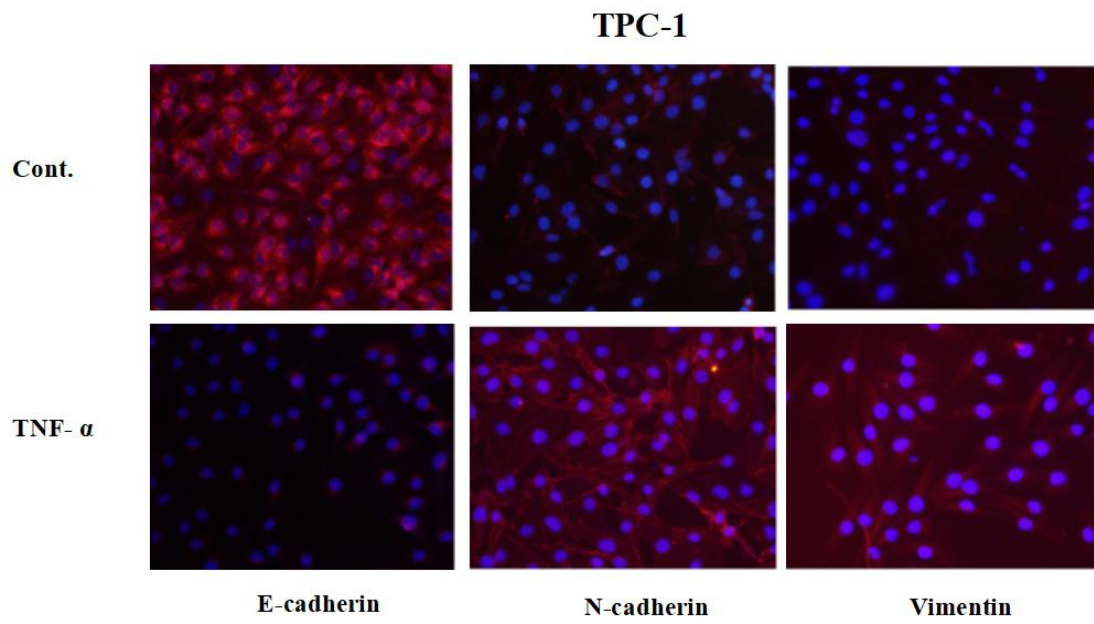

**Fig.s3** Immunofluorescence images of EMT markers in BCPAP

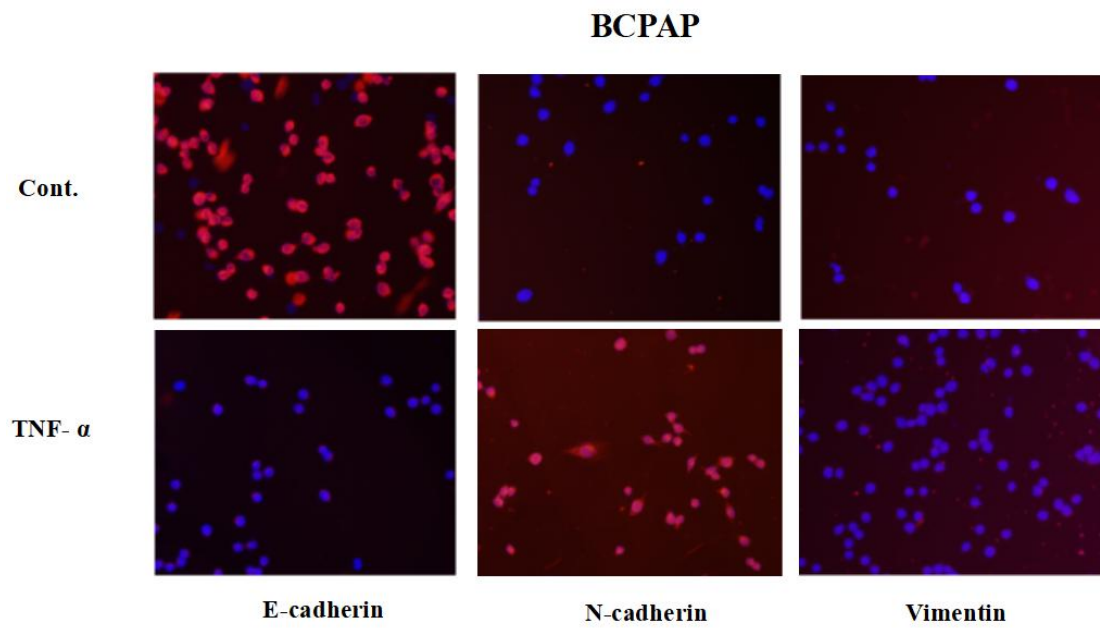

**Fig.s4** Immunofluorescence images of EMT markers in K1

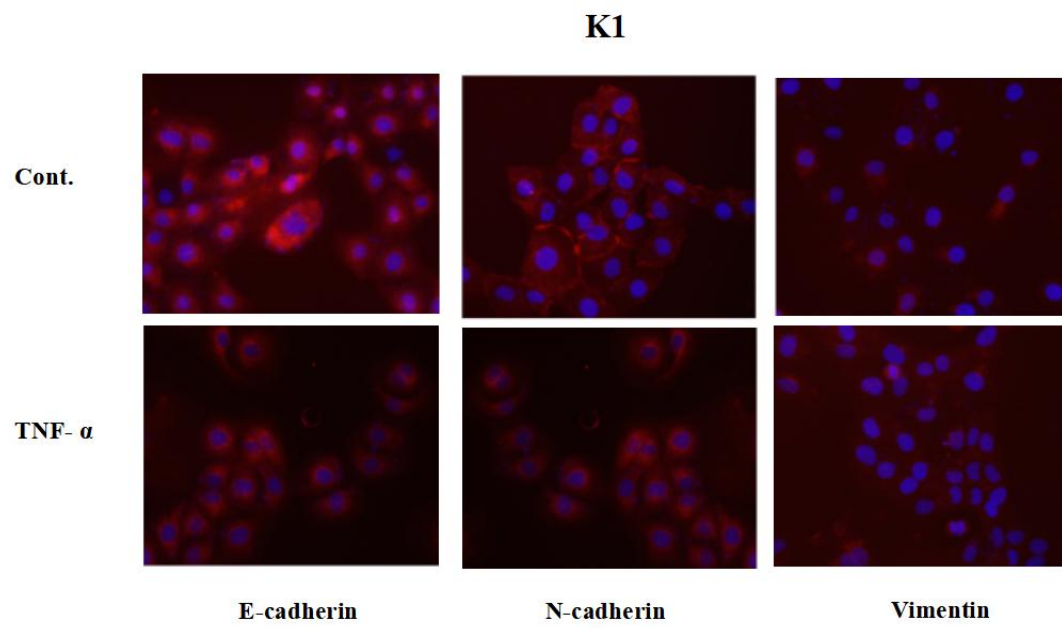

Supplement: jcav12p2777s1.pdf [file jcav12p2777s1.pdf]
